# Supplementary material for: Der Verlauf von psychischen Problemen bei fremdplatzierten Kindern und Jugendlichen bis in deren Erwachsenenalter
Source: Atypon-hosted journal article supplement (doi:10.1026/0942-5403/a000365), 2022-01-01
Supplement: 0942-5403_a000365_esm2.pdf [file 0942-5403_a000365_esm2.pdf]

**ESM 2.** Tabelle E1. Repräsentativität der MAZ.-JAEL Stichprobe (N = 592)

| Charakteristika                            | MAZ.-Teilnehmende<br>(N = 361) | MAZ.-JAEL Teilnehmende<br>(N = 231) | <i>p</i> -Wert |
|--------------------------------------------|--------------------------------|-------------------------------------|----------------|
| Alter (in Jahren) <sup>a</sup>             | 16.22 (2.53)                   | 16.33 (2.62)                        | .65            |
| <i>Geschlecht</i> <sup>b</sup>             |                                |                                     | .81            |
| Weiblich                                   | 114 (31.6)                     | 155 (67.1)                          |                |
| Männlich                                   | 247 (68.4)                     | 76 (32.9)                           |                |
| Nationalität (Schweiz) <sup>b</sup>        | 298 (82.6)                     | 203 (88.0)                          | .10            |
| <i>Platzierungsgrundlage</i> <sup>b</sup>  |                                |                                     | .31            |
| Zivilrechtlich                             | 198 (54.9)                     | 114 (49.4)                          |                |
| Strafrechtlich                             | 89 (24.7)                      | 59 (25.5)                           |                |
| andere                                     | 65 (18.0)                      | 25 (10.8)                           |                |
| Internalisierende<br>Probleme <sup>a</sup> | 57.90 (10.65)                  | 57.49 (11.29)                       | .68            |
| Externalisierende<br>Probleme <sup>a</sup> | 60.76 (10.04)                  | 61.43 (11.20)                       | .49            |
| Gesamtauffälligkeit <sup>a</sup>           | 61.10 (10.04)                  | 60.90 (10.79)                       | .90            |

*Anmerkungen:* <sup>a</sup>Angaben in Mittelwert (Standardabweichung); <sup>b</sup>Angaben in absoluten Zahlen (Prozent).
