# Supplementary material for: Der Verlauf von psychischen Problemen bei fremdplatzierten Kindern und Jugendlichen bis in deren Erwachsenenalter
Source: Atypon-hosted journal article supplement (doi:10.1026/0942-5403/a000365), 2022-01-01
Supplement: 0942-5403_a000365_esm3.pdf [file 0942-5403_a000365_esm3.pdf]

**ESM 3.** Tabelle E2. Das STROBE Statement – Checkliste der Punkte, die in Berichte über Beobachtungsstudien von *Kohortenstudien* enthalten sein sollten

|                           | <b>Nr.</b> | <b>Empfehlung</b>                                                                                                                                                                                                                                                                                                            | <b>Seite</b>    |
|---------------------------|------------|------------------------------------------------------------------------------------------------------------------------------------------------------------------------------------------------------------------------------------------------------------------------------------------------------------------------------|-----------------|
| <b>Titel und Abstract</b> | 1          | (a) Machen Sie das Studiendesign im Titel oder Abstract kenntlich, indem Sie dafür einen allgemein gebräuchlichen Begriff verwenden                                                                                                                                                                                          | 1, 2            |
|                           |            | (b) Verfassen Sie für das Abstract eine aussagefähige und ausgewogene Zusammenfassung dessen, was in der Studie gemacht wurde und was herausgefunden wurde                                                                                                                                                                   | 2, 3            |
| <b>Einleitung</b>         |            |                                                                                                                                                                                                                                                                                                                              |                 |
| Hintergrund/Rationale     | 2          | Erläutern Sie den wissenschaftlichen Hintergrund und die Rationale für die vorgestellte Studie                                                                                                                                                                                                                               | 4, 5            |
| Zielsetzungen             | 3          | Geben Sie alle spezifischen Zielsetzungen einschließlich der (vorab festgelegten) Hypothesen an                                                                                                                                                                                                                              | 6               |
| <b>Methoden</b>           |            |                                                                                                                                                                                                                                                                                                                              |                 |
| Studiendesign             | 4          | Beschreiben Sie die wichtigsten Elemente des Studiendesigns möglichst früh im Artikel                                                                                                                                                                                                                                        | 6               |
| Rahmen                    | 5          | Beschreiben Sie den Rahmen (Setting) und Ort der Studie und machen Sie relevante zeitliche Angaben, einschließlich der Zeiträume der Rekrutierung, der Exposition, der Nachbeobachtung und der Datensammlung                                                                                                                 | 6, 7            |
| Studienteilnehmende       | 6          | (a) Geben Sie die Einschlusskriterien, die Herkunft der Teilnehmenden sowie die Methoden ihrer Auswahl an; beschreiben Sie die Methoden der Nachbeobachtung<br>(b) Geben Sie für Studien, die Matching (Paarbildung) verwenden, die Matchingkriterien und die Anzahl der exponierten und der nicht exponierten Teilnehmer an | 6, 7<br><br>N/A |
| Variablen                 | 7          | Definieren Sie eindeutig alle Zielgrößen, Expositionen, Prädiktoren, möglichen Confounder und Effektmodifikatoren; geben Sie gegebenenfalls Diagnosekriterien an                                                                                                                                                             | 7, 8            |
| Datenquellen/Messmethoden | 8*         | Geben Sie für jede in der Studie wichtige Variable die Datenquellen an und erläutern Sie die verwendeten Bewertungs- bzw.                                                                                                                                                                                                    | 7, 8            |

|                        |     |                                                                                                                                                                                                                                                                                                                                                                                                                                                                                                   |                                                           |
|------------------------|-----|---------------------------------------------------------------------------------------------------------------------------------------------------------------------------------------------------------------------------------------------------------------------------------------------------------------------------------------------------------------------------------------------------------------------------------------------------------------------------------------------------|-----------------------------------------------------------|
|                        |     | Messmethoden. Beschreiben Sie die Vergleichbarkeit der Messmethoden, wenn es mehr als eine Gruppe gibt                                                                                                                                                                                                                                                                                                                                                                                            |                                                           |
| Bias                   | 9   | Beschreiben Sie, was unternommen wurde, um möglichen Ursachen von Bias zu begegnen                                                                                                                                                                                                                                                                                                                                                                                                                | 9                                                         |
| Studiengröße           | 10  | Erklären Sie, wie die Studiengröße ermittelt wurde                                                                                                                                                                                                                                                                                                                                                                                                                                                | 7, 9                                                      |
| Quantitative Variablen | 11  | Erklären Sie, wie in den Auswertungen mit quantitativen Variablen umgegangen wurde. Wenn nötig, beschreiben Sie, wie Kategorien (Gruppierungen) gebildet wurden und warum                                                                                                                                                                                                                                                                                                                         | 8                                                         |
| Statistische Methoden  | 12  | (a) Beschreiben Sie alle statistischen Methoden, einschließlich der Methoden, die für die Kontrolle von Confounding verwendet wurden<br>(b) Beschreiben Sie Verfahren, mit denen Subgruppen und Interaktionen untersucht wurden<br>(c) Erklären Sie, wie mit fehlenden Daten umgegangen wurde<br>(d) Erklären Sie gegebenenfalls wie mit dem Problem des vorzeitigen Ausscheidens aus der Studie („loss to follow-up“) umgegangen wurde<br>(e) Beschreiben Sie vorgenommene Sensitivitätsanalysen | 8, 9<br><br>N/A<br><br>9<br><br>9<br><br>N/A              |
| <b>Ergebnisse</b>      |     |                                                                                                                                                                                                                                                                                                                                                                                                                                                                                                   |                                                           |
| Teilnehmende           | 13* | (a) Geben Sie die Anzahl der Teilnehmer während jeder Studienphase an, z. B. die Anzahl der Teilnehmer, die potenziell geeignet waren, die auf Eignung untersucht wurden, die als geeignet bestätigt wurden, die tatsächlich an der Studie teilgenommen haben, deren Nachbeobachtung abgeschlossen wurde und deren Daten ausgewertet wurden<br>(b) Geben Sie die Gründe für die Nicht-Teilnahme in jeder Studienphase an<br>(c) Erwägen Sie die Darstellung in einem Flussdiagramm                | 7<br><br>ESM 1.<br>Abbildung E1<br>ESM 1.<br>Abbildung E1 |
| Deskriptive Daten      | 14* | (a) Beschreiben Sie Charakteristika der Studienteilnehmer (z. B. demographische, klinische und soziale Merkmale) sowie                                                                                                                                                                                                                                                                                                                                                                            | 9, 10                                                     |

|                                  |     |                                                                                                                                                                                                                                                                                                                |        |
|----------------------------------|-----|----------------------------------------------------------------------------------------------------------------------------------------------------------------------------------------------------------------------------------------------------------------------------------------------------------------|--------|
|                                  |     | Expositionen und mögliche Confounder<br>(b) Geben Sie für jede Variable die Anzahl der Teilnehmer mit fehlenden Daten an<br>(c) Fassen Sie die Nachbeobachtungszeit zusammen (z. B. Mittelwert und Gesamtzeitraum)                                                                                             | 9<br>6 |
| Ergebnisdaten                    | 15* | Berichten Sie über die Anzahl der Zielereignisse oder statistische Maßzahlen (z. B. Mittelwert und Standardabweichung) im zeitlichen Verlauf                                                                                                                                                                   | 10     |
| Hauptergebnisse                  | 16  | (a) Geben Sie die unadjustierten Schätzwerte an und gegebenenfalls auch die Schätzwerte, in denen Adjustierungen für die Confounder vorgenommen wurden sowie deren Präzision (z. B. 95%-Konfidenzintervall); machen Sie deutlich, für welche Confounder adjustiert wurde und warum diese berücksichtigt wurden | 11, 12 |
|                                  |     | (b) Wenn stetige Variablen kategorisiert wurden, geben Sie die oberen und unteren Grenzwerte der einzelnen Kategorien an                                                                                                                                                                                       | 9-12   |
|                                  |     | (c) Wenn relevant, erwidern Sie, für aussagekräftige Zeitpunkte Schätzwerte relativer Risiken auch als absolute Risiken auszudrücken                                                                                                                                                                           | 9-12   |
| Weitere Auswertungen             | 17  | Berichten Sie über weitere vorgenommene Auswertungen, z. B. die Analyse von Subgruppen und Wechselwirkungen (Interaktionen) sowie Sensitivitätsanalysen                                                                                                                                                        | N/A    |
| <b>Diskussion</b>                |     |                                                                                                                                                                                                                                                                                                                |        |
| Hauptergebnisse                  | 18  | Fassen Sie die wichtigsten Ergebnisse in Hinblick auf die Studienziele zusammen                                                                                                                                                                                                                                | 12-16  |
| Limitationen                     | 19  | Diskutieren Sie die Einschränkungen der Studie und berücksichtigen Sie dabei die Gründe für möglichen Bias oder Impräzision. Diskutieren Sie die Richtung sowie das Ausmaß jedes möglichen Bias                                                                                                                | 12-16  |
| Interpretation                   | 20  | Nehmen Sie eine vorsichtige übergreifende Interpretation der Resultate vor und berücksichtigen Sie dabei die Ziele und Einschränkungen der Studie, die Multiplizität der Analysen, die Ergebnisse anderer Studien und andere relevante Evidenz                                                                 | 14-17  |
| Übertragbarkeit                  | 21  | Besprechen Sie die Übertragbarkeit (externe Validität) der Studienergebnisse                                                                                                                                                                                                                                   | 16, 17 |
| <b>Zusätzliche Informationen</b> |     |                                                                                                                                                                                                                                                                                                                |        |

|              |    |                                                                                                                                                                                                                        |    |
|--------------|----|------------------------------------------------------------------------------------------------------------------------------------------------------------------------------------------------------------------------|----|
| Finanzierung | 22 | Geben Sie an, wie die vorliegende Studie finanziert wurde, und erläutern Sie die Rolle der Geldgeber. Machen Sie diese Angaben gegebenenfalls auch für die Originalstudie, auf welcher der vorliegende Artikel basiert | 21 |
|--------------|----|------------------------------------------------------------------------------------------------------------------------------------------------------------------------------------------------------------------------|----|

*Anmerkung:* N/A = Nicht anwendbar. Jeder Punkt der Checkliste wird in einem Begleitartikel (*Explanation and Elaboration*) besprochen, der methodologische Hintergründe diskutiert und publizierte Beispiele transparenter Berichterstattung vorstellt. Die STROBE-Checkliste wird am besten zusammen mit diesem Artikel angewandt (frei zugänglich auf den folgenden Webseiten: PLoS Medicine <http://www.plosmedicine.org>, Annals of Internal Medicine <http://www.annals.org> und Epidemiology <http://www.epidem.com>). Zusätzliche Versionen der Checkliste spezifisch für Kohorten-, Fallkontroll- oder Querschnittsstudien sind auf der STROBE-Webseite (<http://www.strobe-statement.org>) auf Englisch verfügbar.

\*Geben Sie diese Informationen jeweils gesondert für Fälle und Kontrolle in Fallkontrollstudien an, und gegebenenfalls für exponierte und nicht-exponierte Gruppen in Kohorten- und Querschnittsstudien.
