# Supplementary material for: Der Verlauf von psychischen Problemen bei fremdplatzierten Kindern und Jugendlichen bis in deren Erwachsenenalter
Source: Atypon-hosted journal article supplement (doi:10.1026/0942-5403/a000365), 2022-01-01
Supplement: 0942-5403_a000365_esm4.pdf [file 0942-5403_a000365_esm4.pdf]

## ESM 4. Beschreibung der Messinstrumente Relevanter Prädiktoren

### Delinquenz

Für die Erfassung der Delinquenz wurden die kriminologischen Fragen von der „Münsteraner Längsschnittstudie“ (Boers & Reinecke, 2007) als Grundlage herbeigezogen und für die MAZ.-Studie modifiziert. Die Fragen erfassten delinquente Verhaltensweisen im Selbsturteil (z.B., Sachbeschädigung, Diebstahl, Drogendelikte). Die Fragen wurden mit 0 = *nein* und 1 = *ja* beantwortet, folgend mit Informationen zum Alter und der Frequenz, falls die Frage mit *ja* beantwortet wurde. Der Schweregrad der Delikte wurde entsprechend der Einteilung nach Münster in 5 Kategorien eingeteilt, um einen Varianzscore an unterschiedlich begangenen Delikten zu erhalten: 0 = *keine Delikte*, 1 = *Leichte Delikte*, 2 = *Mittelschwere*, 3 = 7 *unterschiedliche Delikte*, 4 = > 7 *unterschiedliche Delikte*.

### Psychopathische Persönlichkeitseigenschaften

Psychopathische Züge würden mit dem Youth Psychopathic traits Inventory (YPI; Andershed, Kerr, Stattin & Levander, 2002) erfasst. Das YPI ist ein 50-Item-Selbstbericht-Fragebogen für Jugendliche im Alter von 12–18 Jahren. Für die vorliegende Arbeit haben wir den Mittelwert über den Gesamttest des YPI für jeden Teilnehmenden berücksichtigt. Drei Haupt-Persönlichkeitseigenschaften der Psychopathie mit jeweils fünf Items pro Subskala werden erfasst: Grandios-Manipulativ (mit den Subskalen Uehrlicher Charme, Grandiosität, Lügen und Manipulation), Gefühllos-Unemotional (mit den Subskalen Kalthertigkeit, Unemotionalität, Keine Reue) und Impulsiv-Unverantwortlich (mit den Subskalen Impulsivität, Abenteuer-Suche, Unverantwortlichkeit). Jedes Item wird auf einer 4-Punkte-Likert-Skala bewertet (1 = *trifft überhaupt nicht zu*, 2 = *trifft nicht gut zu*, 3 = *trifft ziemlich gut zu*, 4 = *trifft sehr gut zu*). Der YPI zeigte auch im Deutschsprachigen allgemein sehr gute psychometrische Eigenschaften (Stadlin, Perez, Schmeck, Di Gallo & Schmid, 2016).

## Literatur

Andershed, H. A., Kerr, M., Stattin, H. & Levander, S. (2002). *Psychopathic traits in non-referred youths: A new assessment tool*. Den Haag: Elsevier.

Boers, K. & Reinecke, J. (2007). *Delinquenz im Jugendalter. Erkenntnisse einer Münsteraner Längsschnittstudie*. Münster: Waxmann.

Stadlin, C., Perez, T., Schmeck, K., Di Gallo, A. & Schmid, M. (2016). Construct validity and factor structure of the German version of the youth psychopathic traits inventory (YPI) in a representative school sample. *Diagnostica*, 62, 85–96.
