# Supplementary material for: Der Verlauf von psychischen Problemen bei fremdplatzierten Kindern und Jugendlichen bis in deren Erwachsenenalter
Source: Atypon-hosted journal article supplement (doi:10.1026/0942-5403/a000365), 2022-01-01
Supplement: 0942-5403_a000365_esm5.pdf [file 0942-5403_a000365_esm5.pdf]

**ESM 5.** Tabelle E3. Selektionsanalyse für Teilnehmende mit vollständigen Daten verglichen mit Teilnehmenden mit fehlenden Daten (N = 164)

| Charakteristika                            | Teilnehmende mit<br>vollständigen Daten<br>(N = 143) | Teilnehmende mit<br>fehlenden Daten<br>(N = 21) | <i>p</i> -Wert |
|--------------------------------------------|------------------------------------------------------|-------------------------------------------------|----------------|
| Alter (in Jahren) <sup>a</sup>             | 15.40 (1.61)                                         | 15.04 (1.85)                                    | .39            |
| <i>Geschlecht</i> <sup>b</sup>             |                                                      |                                                 | 1              |
| Weiblich                                   | 53 (37.1)                                            | 8 (44.2)                                        |                |
| Männlich                                   | 90 (63.0)                                            | 13 (61.9)                                       |                |
| Nationalität (Schweiz) <sup>b</sup>        | 127 (88.9)                                           | 18 (85.7)                                       | .96            |
| <i>Platzierungsgrundlage</i> <sup>b</sup>  |                                                      |                                                 | .80            |
| Zivilrechtlich                             | 74 (51.8)                                            | 13 (61.9)                                       |                |
| Strafrechtlich                             | 29 (20.3)                                            | 4 (19.0)                                        |                |
| andere                                     | 39 (27.3)                                            | 5 (23.8)                                        |                |
| Internalisierende<br>Probleme <sup>a</sup> | 59.03 (11.71)                                        | 58.14 (8.85)                                    | .68            |
| Externalisierende<br>Probleme <sup>a</sup> | 62.41 (11.56)                                        | 64.24 (11.34)                                   | .50            |
| Gesamtauffälligkeit <sup>a</sup>           | 62.62 (11.24)                                        | 62.29 (8.43)                                    | .87            |

*Anmerkungen:* <sup>a</sup>Angaben in Mittelwert (Standardabweichung); <sup>b</sup>Angaben in absoluten Zahlen (Prozent).
