# Supplementary material for: Der Verlauf von psychischen Problemen bei fremdplatzierten Kindern und Jugendlichen bis in deren Erwachsenenalter
Source: Atypon-hosted journal article supplement (doi:10.1026/0942-5403/a000365), 2022-01-01
Supplement: 0942-5403_a000365_esm6.pdf [file 0942-5403_a000365_esm6.pdf]

**ESM 6.** Tabelle E4. Korrelationsmatrix der Prädiktorvariablen mit den psychischen Problemen zu JAEL (N = 164)

|                                            | 1.     | 2.     | 3.    | 4.    | 5.    | 6.       | 7.    | 8.      | 9.      | 10.     | 11.     | 12.     | 13.     | 14.     | 15. |
|--------------------------------------------|--------|--------|-------|-------|-------|----------|-------|---------|---------|---------|---------|---------|---------|---------|-----|
| 1. Alter                                   | 1      |        |       |       |       |          |       |         |         |         |         |         |         |         |     |
| 2. Geschlecht                              | 0.15   | 1      |       |       |       |          |       |         |         |         |         |         |         |         |     |
| 3. Nationalität                            | -0.12  | -0.08  | 1     |       |       |          |       |         |         |         |         |         |         |         |     |
| 4. Platzierungsgrundlage <sup>a</sup>      | -0.14  | 0.03   | 0.10  | 1     |       |          |       |         |         |         |         |         |         |         |     |
| 5. Anzahl bisheriger Fremdunterbringungen  | 0.04   | -0.05  | 0.05  | -0.08 | 1     |          |       |         |         |         |         |         |         |         |     |
| 6. Alter erste Fremdunterbringung          | 0.44   | 0.07   | -0.18 | 0.11  | -0.20 | 1        |       |         |         |         |         |         |         |         |     |
| 7. Dauer der Fremdunterbringungen          | -0.20  | -0.06  | 0.15  | 0.03  | 0.24  | -0.64*** | 1     |         |         |         |         |         |         |         |     |
| 8. Schweregrad der Delikte                 | 0.34** | -0.12  | -0.20 | -0.24 | 0.21  | 0.13     | -0.25 | 1       |         |         |         |         |         |         |     |
| 9. Psychopathische Persönlichkeitszüge     | 0.19   | -0.17  | -0.03 | -0.25 | 0.28* | -0.13    | 0.01  | 0.50*** | 1       |         |         |         |         |         |     |
| 10. T-Wert Internalisierende Probleme MAZ. | 0.02   | 0.31** | -0.12 | -0.03 | 0.13  | -0.27    | 0.05  | 0.01    | 0.13    | 1       |         |         |         |         |     |
| 11. T-Wert Externalisierende Probleme MAZ. | 0.16   | 0.25   | -0.13 | -0.14 | 0.30* | -0.12    | 0.00  | 0.44*** | 0.51*** | 0.57*** | 1       |         |         |         |     |
| 12. T-Wert Gesamtauffälligkeit MAZ.        | 0.08   | 0.30** | -0.11 | -0.08 | 0.25  | -0.23    | 0.07  | 0.19    | 0.32**  | 0.88*** | 0.83*** | 1       |         |         |     |
| 13. T-Wert Internalisierende Probleme JAEL | -0.09  | 0.31*  | 0.17  | 0.14  | 0.03  | 0.09     | 0.09  | -0.13   | 0.02    | 0.40*** | 0.26    | 0.37*** | 1       |         |     |
| 14. T-Wert Externalisierende Probleme JAEL | 0.08   | 0.17   | 0.05  | -0.02 | 0.25  | 0.09     | 0.06  | 0.30*   | 0.30*   | 0.20    | 0.42*** | 0.35**  | 0.58*** | 1       |     |
| 15. T-Wert Gesamtauffälligkeit JAEL        | 0.03   | 0.24   | 0.08  | 0.07  | 0.13  | 0.20     | 0.07  | 0.07    | 0.16    | 0.37*** | 0.35*** | 0.43*** | 0.88*** | 0.79*** | 1   |

*Anmerkungen:* Kategoriale Variablen wurden mit der Spearman's Korrelation getestet, kontinuierliche Variablen wurden jeweils mit der Pearson's Korrelation untersucht.

<sup>a</sup>Die Platzierungsgrundlage wurde für die Korrelationsanalysen als dreistufige Variable eingegeben (0 = andere, 1 = strafrechtlich und 2 = zivilrechtlich).

\*  $p < .05$ ; \*\*  $p < .01$ ; \*\*\*  $p < .001$
