# Supplementary figures and images for: Der Verlauf von psychischen Problemen bei fremdplatzierten Kindern und Jugendlichen bis in deren Erwachsenenalter
Source: Atypon-hosted journal article supplement (doi:10.1026/0942-5403/a000365), 2022-01-01

ESM 1. Abbildung E1. Flussdiagramm der MAZ.-JAEL-Stichprobe.

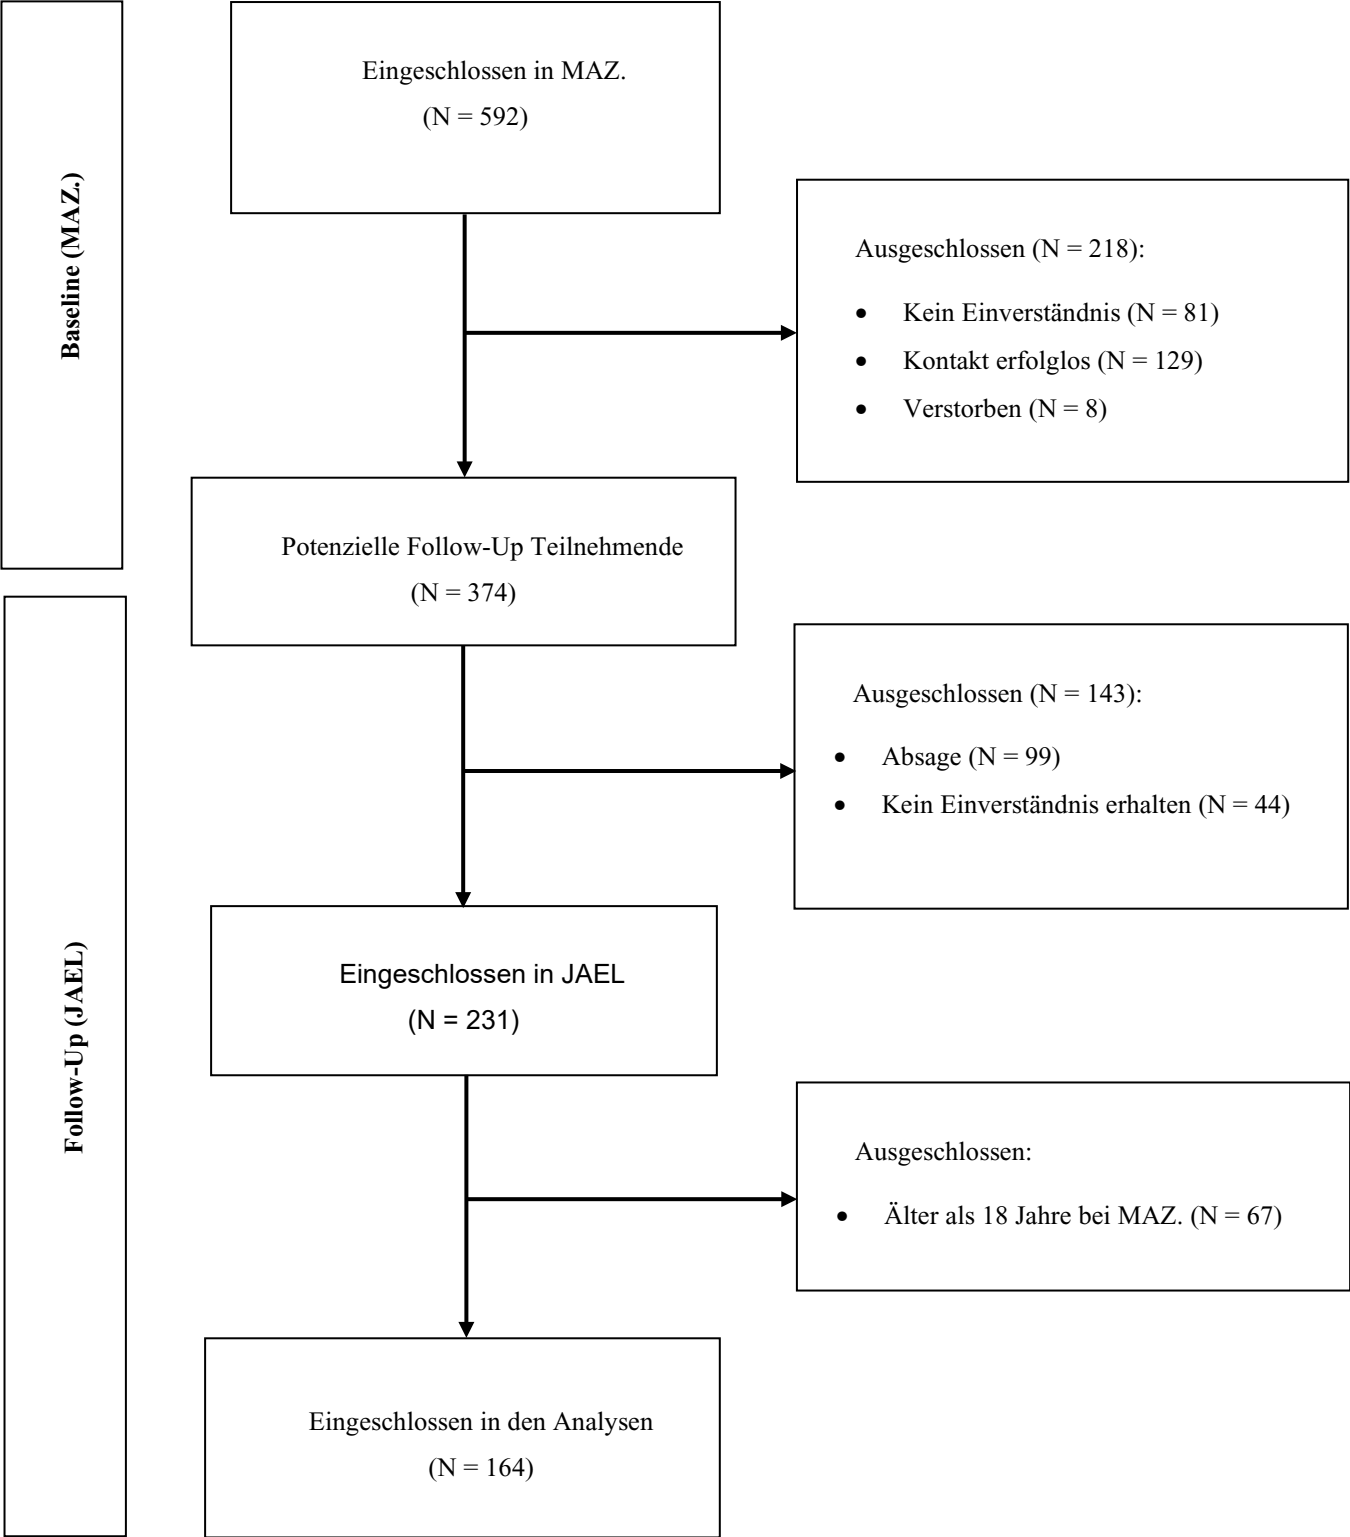

Supplement: 0942-5403_a000365_esm1.pdf [file 0942-5403_a000365_esm1.pdf]
